# Supplementary figures and images for: Long Non-Coding RNA Expression Levels Modulate Cell-Type-Specific Splicing Patterns by Altering Their Interaction Landscape with RNA-Binding Proteins
Source: MDPI journal article supplement (doi:10.3390/genes10080593), 2019-08-06

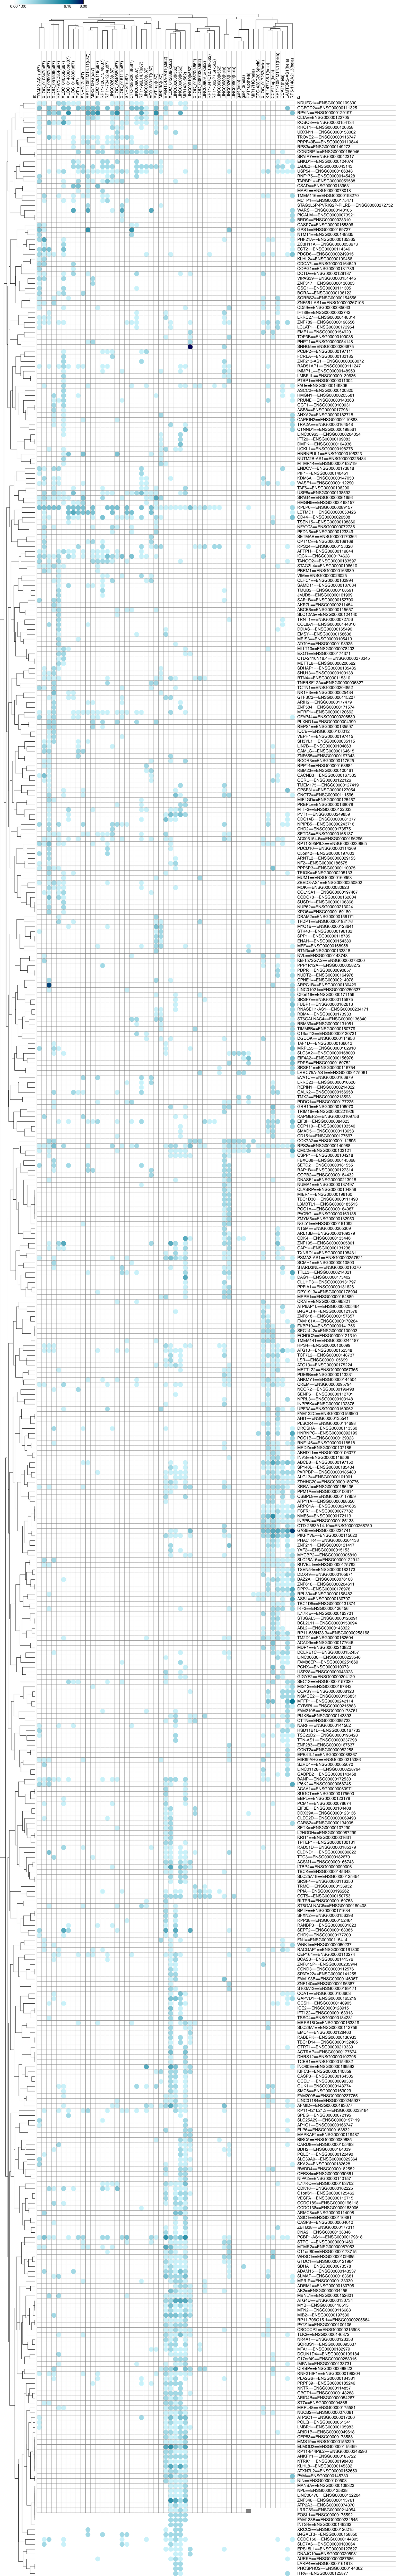

Supplement: s1 [file s1]

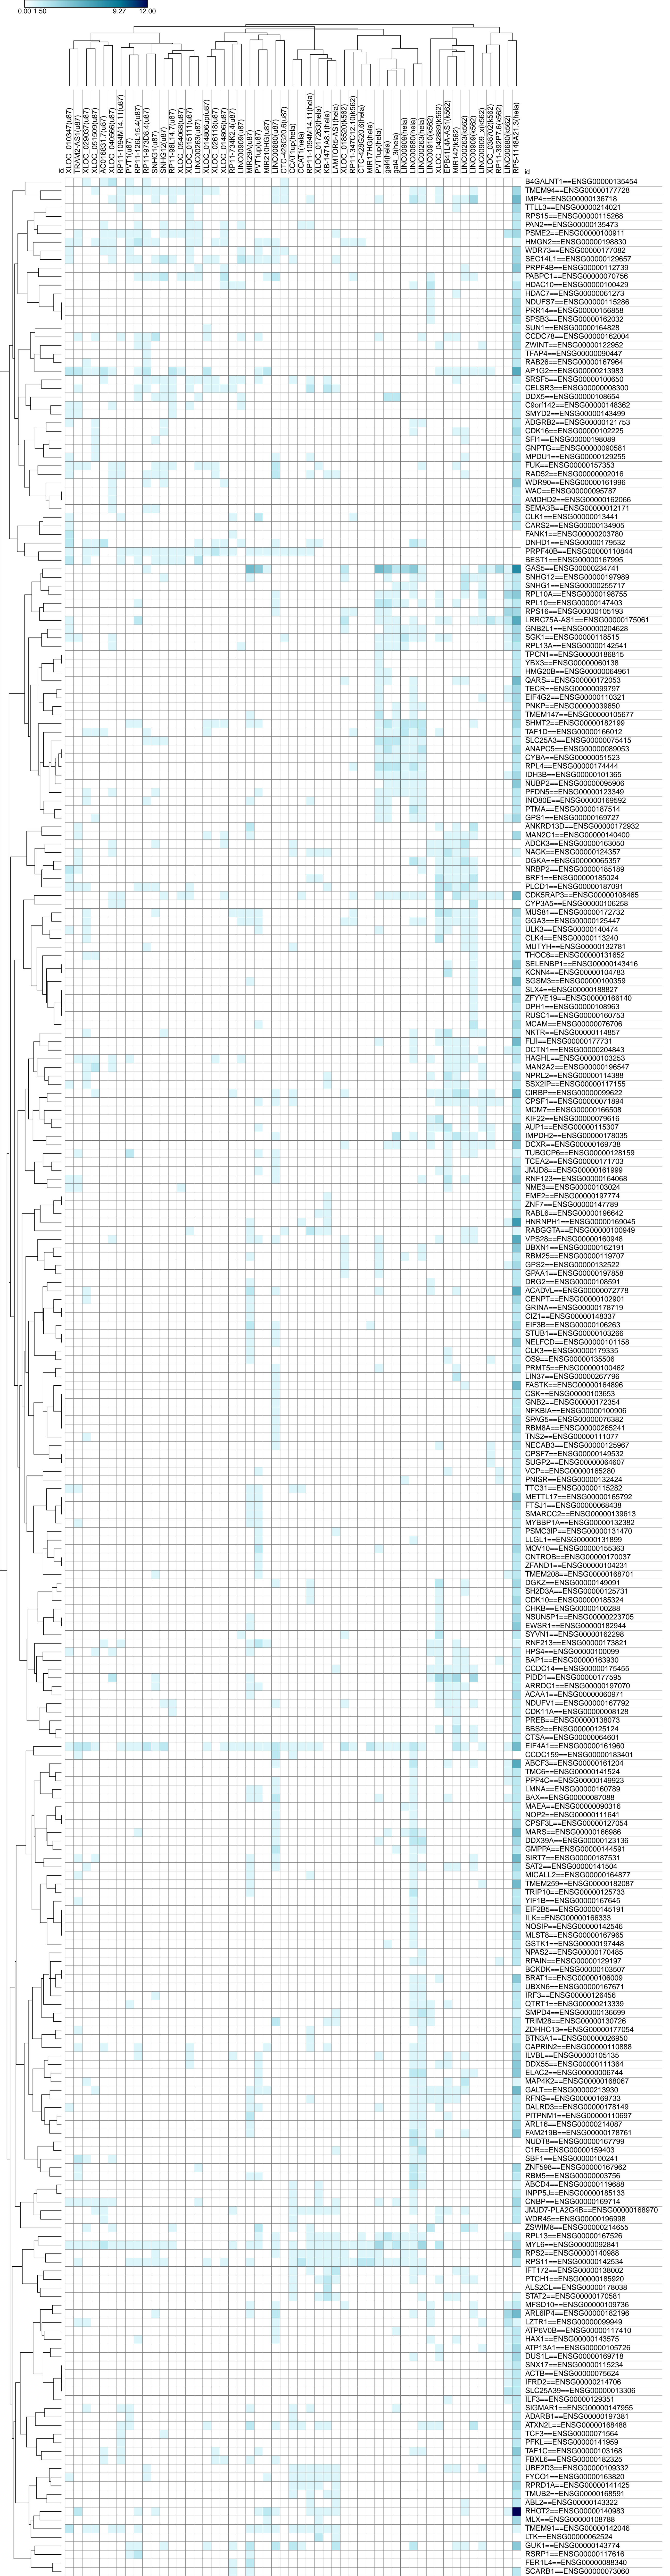

Supplement: s1 [file s1]
